# Supplementary material for: Topologically protected Dirac plasmons and their evolution across the quantum phase transition in a (Bi1−xInx)2Se3topological insulator
Source: Royal Society of Chemistry journal article supplement (doi:10.1039/c5nr02976g), 2016-01-01
Supplement: c5nr02976g1.pdf [file c5nr02976g1.pdf]

## Supplementary Information for *Topologically protected Dirac plasmons and their evolution across the Quantum Phase Transition in (Bi<sub>1-x</sub>In<sub>x</sub>)<sub>2</sub>Se<sub>3</sub> Topological Insulator*

Marta Autore<sup>a</sup>, Favio Giorgianni,<sup>a</sup> Fausto D' Apuzzo,<sup>b</sup> Alessandra Di Gaspare,<sup>c</sup> Irene Lo Vecchio,<sup>d</sup> Matthew Brahlek,<sup>e</sup> Nikesh Koirala,<sup>e</sup> Seongshik Oh,<sup>e</sup> Ulrich Schade,<sup>f</sup> Michele Ortolani,<sup>d</sup> and Stefano Lupi<sup>a</sup>

<sup>a</sup> INFN and Dipartimento di Fisica, Università di Roma "La Sapienza", Piazzale A. Moro 2, I-00185 Roma, Italy.

<sup>b</sup> Istituto Italiano di Tecnologia and Dipartimento di Fisica, Università di Roma "La Sapienza", Piazzale A. Moro 2, I-00185 Roma, Italy.

<sup>c</sup> LNF-INFN and CNR-IFN, Via E. Fermi 40, 00044 Frascati, Italy.

<sup>d</sup> Dipartimento di Fisica, Università di Roma "La Sapienza", Piazzale A. Moro 2, I-00185 Roma, Italy.

<sup>e</sup> Department of Physics and Astronomy Rutgers, The State University of New Jersey 136 Frelinghuysen Road Piscataway, NJ 08854-8019 USA.

<sup>f</sup> Helmholtz-Zentrum Berlin für Materialien und Energie GmbH Elektronenspeicherring BESSY II, Albert-Einstein-Strasse 15, D-12489 Berlin, Germany.

<sup>g</sup> INFN and Dipartimento di Fisica, Università di Roma "La Sapienza", Piazzale A. Moro 2, I-00185 Roma, Italy. Tel: +39 6 4991 XXXX; E-mail: stefano.lupi@roma1.infn.it

### *Attribution of single particle response to Dirac carriers*

In order to attribute the single particle Drude response and the collective plasmon behavior to Dirac carriers in Bi<sub>2</sub>Se<sub>3</sub>, we calculate the surface density of carriers participating to the electronic

response at 10 K, using the sum rule for the real part of the conductance  $G_1(\omega) = \frac{e^2}{\hbar} \frac{\omega_e \Gamma}{\omega^2 + \Gamma^2}$ :

$$\frac{2}{\pi} \int G_1(\omega) d\omega = \frac{e^2}{\hbar} \omega_e = \frac{n_{2D} e^2}{m^*}$$

where  $\omega = 2\pi\nu$ ,  $n_{2D}$  is the surface density of carriers (*per surface*). Assuming that only Dirac carriers

participate to the conduction one has  $m^* = \hbar k_F / v_F$  and  $v_F = \partial E_F / \hbar \partial k_F$ . The energy/momentum

dispersion has been measured and shows a quadratic correction to the linear term:

$E_F = Ak_F + Bk_F^2 = 2.02k_F + 10.44k_F^2$ .<sup>1</sup> Moreover, for a single surface state one has  $n_{2D} = \frac{k_F^2}{4\pi}$ .

Assuming that each surface has the same charge density and contributes equally to the conductance one obtains from the sum-rule:

$$\omega_e \frac{e^2}{\hbar} = \frac{k_F(A + 2Bk_F)e^2}{2\pi\hbar^2}$$

Then, setting  $v_e = \frac{\omega_e}{2\pi} = 34.1$  THz as obtained from Drude-Lorentz fit one achieves  $n_{2D} = 1.8 \cdot 10^{13}$  cm<sup>-2</sup>, in good agreement with Dirac surface density estimated from transport measurements.<sup>[2]</sup> This result suggests that, at low-T, the major part of the optical spectral weight and therefore the corresponding conductivity determining the plasmon response is due to Dirac carriers.

<sup>1</sup> L. Wu, M. Brahlek, R. V. Aguilar, A. V. Stier, C. M. Morris, Y. Lubashevsky, L. S. Bilbro, N. Bansal, S. Oh, and N. P. Armitage, *Nature Phys.* 9, 410 (2013).

<sup>2</sup> N. Bansal, Y. S. Kim, M. Brahlek, E. Edrey, and S. Oh, *Phys. Rev. Lett.* 109, 116804 (2012).
